# Supplementary material
Source: PubMed Central journal article supplement (PMC7395511)
Supplement: pnas.2008868117.sapp.pdf [file pnas.2008868117.sapp.pdf]

## Supplementary Information

### Example “Trap Question”

Which of the following is not a US city? This is a data quality check. Regardless of the true value, please select Chicago.

- New York City
- Tokyo
- Chicago
- Boston
- Miami

**Supplementary Table S1.** Demographic Details of Participants Included in Study 1 and Study 2.

|                                              | Study 1   |      | Study 2   |      |
|----------------------------------------------|-----------|------|-----------|------|
|                                              | Frequency | %    | Frequency | %    |
| <b>Gender</b>                                |           |      |           |      |
| Female                                       | 198       | 49.9 | 212       | 46.8 |
| Male                                         | 199       | 50.1 | 241       | 53.2 |
| <b>Education level</b>                       |           |      |           |      |
| Primary school                               | 0         | 0.0  | 0         | 0.0  |
| Middle school or equivalent                  | 0         | 0.0  | 2         | 0.4  |
| High school or equivalent                    | 85        | 21.4 | 122       | 26.9 |
| Undergraduate degree                         | 212       | 53.4 | 250       | 55.2 |
| Master degree                                | 83        | 20.9 | 71        | 15.7 |
| Doctoral degree                              | 17        | 4.3  | 8         | 1.8  |
| <b>Income level ("for my age group ...")</b> |           |      |           |      |
| below average income in my country           | 129       | 32.5 | 162       | 35.8 |
| average income in my country                 | 228       | 57.4 | 247       | 54.5 |
| above average income in my country           | 40        | 10.1 | 44        | 9.7  |
| <b>Ethnicity</b>                             |           |      |           |      |
| Hispanic                                     | 36        | 9.1  | 28        | 6.2  |
| White (non-Hispanic)                         | 301       | 75.8 | 315       | 69.5 |
| Asian (South or Southeast)                   | 29        | 7.3  | 73        | 16.1 |
| Asian (East)                                 | 13        | 3.3  | 17        | 3.8  |
| Black                                        | 14        | 3.5  | 13        | 2.9  |
| Pacific Islander                             | 0         | 0.0  | 0         | 0.0  |
| Other                                        | 4         | 1.0  | 7         | 1.5  |
| Total                                        | 397       |      | 453       |      |

**Supplementary Table S2.** Correlation Matrix of Variables in Study 1

|                                 | 1       | 2       | 3     | 4      | 5     | 6       | 7       | 8       |
|---------------------------------|---------|---------|-------|--------|-------|---------|---------|---------|
| 1. Social-distancing compliance | —       |         |       |        |       |         |         |         |
| 2. Age                          | .21***  | —       |       |        |       |         |         |         |
| 3. Gender                       | -.15**  | -.05    | —     |        |       |         |         |         |
| 4. Education                    | -.06    | -.12*   | .03   | —      |       |         |         |         |
| 5. Income                       | .02     | -.01    | .15** | .23*** | —     |         |         |         |
| 6. Depressed mood               | -.37*** | -.27*** | -.02  | .23*** | -.09  | —       |         |         |
| 7. Anxious feelings             | -.27*** | -.28*** | -.07  | .20*** | -.10* | .85***  | —       |         |
| 8. Sleep quality                | -.27*** | -.13**  | -.08  | .09    | -.06  | .66***  | .60***  | —       |
| 9. WM capacity                  | .29***  | -.04    | -.07  | -.10*  | .08   | -.36*** | -.26*** | -.24*** |

Note:  $n = 397$ , WM = working memory, \*  $p < .05$ , \*\*  $p < .01$ , \*\*\*  $p < .001$ .

**Supplementary Table S3.** Correlation Matrix of Variables in Study 2

|                                 | 1       | 2       | 3     | 4      | 5       | 6       | 7       | 8       | 9       | 10      | 11      | 12   | 13     |
|---------------------------------|---------|---------|-------|--------|---------|---------|---------|---------|---------|---------|---------|------|--------|
| 1. Social-distancing compliance | —       |         |       |        |         |         |         |         |         |         |         |      |        |
| 2. Age                          | .18***  | —       |       |        |         |         |         |         |         |         |         |      |        |
| 3. Gender                       | -.13**  | -.13**  | —     |        |         |         |         |         |         |         |         |      |        |
| 4. Education                    | -.13**  | -.01    | .05   | —      |         |         |         |         |         |         |         |      |        |
| 5. Income                       | .04     | -.03    | .04   | .20*** | —       |         |         |         |         |         |         |      |        |
| 6. Depressed mood               | -.28*** | -.16*** | .03   | .16*** | -.12*   | —       |         |         |         |         |         |      |        |
| 7. Anxious feelings             | -.17*** | -.12*   | .02   | .17*** | -.07    | .81***  | —       |         |         |         |         |      |        |
| 8. Agreeableness                | .23***  | .08     | .03   | .01    | .13**   | -.34*** | -.35*** | —       |         |         |         |      |        |
| 9. Conscientiousness            | .24***  | .14**   | -.08  | -.07   | .18***  | -.51*** | -.42*** | .41***  | —       |         |         |      |        |
| 10. Extraversion                | -.05    | .02     | .002  | .05    | .18***  | -.06    | -.10*   | .15*    | .09     | —       |         |      |        |
| 11. Openness                    | .25***  | .04     | .003  | -.13** | -.04    | -.30*** | -.22*** | .23***  | .30***  | .12*    | —       |      |        |
| 12. Neuroticism                 | -.05    | -.09*   | -.10* | .03    | -.20*** | .41***  | .51***  | -.40*** | -.39*** | -.34*** | -.17*** | —    |        |
| 13. RAPM                        | .21***  | .07     | -.02  | -.11*  | .02     | -.19*** | -.12**  | -.001   | .09     | -.13*** | .12*    | .03  | —      |
| 14. WM capacity                 | .25***  | -.09    | -.03  | -.14** | -.01    | -.31*** | -.26*** | .09     | .18***  | -.10*   | .21***  | -.07 | .39*** |

Note:  $n = 453$ , RAPM = Raven's Advanced Progressive Matrices, WM = working memory, \*  $p < .05$ , \*\*  $p < .01$ , \*\*\*  $p < .001$ .

**Supplementary Table S4.** Statements of Benefits and Costs about Social Distancing and Principle Component Analysis of the Self-report Ratings

| Category                | Statement                                                                                             | Note                                                                                                                            | Component Loadings |     |
|-------------------------|-------------------------------------------------------------------------------------------------------|---------------------------------------------------------------------------------------------------------------------------------|--------------------|-----|
| Benefit                 | Social distancing can prevent me from catching coronavirus.                                           | Self-related interest                                                                                                           | .79                | -   |
| Benefit (Reverse coded) | Young adults do not need to practice social distancing.                                               | Social distancing among young adults is beneficial not only to stop virus from spreading, but also to free up medical resource. | .55                | -   |
| Benefit                 | Social distancing stops coronavirus from spreading around.                                            | General benefit                                                                                                                 | .74                | -   |
| Benefit                 | Older adults should stay at home because they are more vulnerable.                                    | Benefit for vulnerable populations                                                                                              | .74                | -   |
| Benefit                 | Social distancing may minimize the burden on medical resources, so people in need can use them.       | Societal benefit                                                                                                                | .73                | -   |
| Cost                    | Not being able to hang out makes me upset.                                                            | Self-related cost                                                                                                               | -                  | .64 |
| Cost                    | Small business (e.g., local restaurants and bars) could not survive if people keep social distancing. | Societal cost                                                                                                                   | -                  | .67 |
| Cost                    | Social distancing makes people lose their jobs.                                                       | Financial cost                                                                                                                  | -                  | .67 |
| Cost                    | I practice social distancing because people around me do so.                                          | Social cost of not following others. A higher score of this social approval item indicates a higher sensitivity to social cost  | -                  | .53 |

*Note: Prompt:* "There are a lot of opinions about the benefit of social distancing. Please tell us what you think (from 'Don't think it is true' = 0 to 'It is very true' = 3)." The rotation method applied is varimax. Only component loadings greater than 0.45 are shown in the table.

**Supplementary Table S5.** Average Payoff Structure of the Fairness Norm Decision-making Task.

| Player A's transfer to Player B (X) | Player A's average total payoff in the baseline condition | Player A's average total payoff in the punishment condition |
|-------------------------------------|-----------------------------------------------------------|-------------------------------------------------------------|
| 0                                   | 125                                                       | 8.25                                                        |
| 10                                  | 115                                                       | 25                                                          |
| 20                                  | 105                                                       | 15.05                                                       |
| 30                                  | 95                                                        | 19.25                                                       |
| 40                                  | 85                                                        | 40.75                                                       |
| 50                                  | 75                                                        | 53.35                                                       |
| 60                                  | 65                                                        | 65                                                          |
| 70                                  | 55                                                        | 55                                                          |
| 80                                  | 45                                                        | 45                                                          |
| 90                                  | 35                                                        | 35                                                          |
| 100                                 | 25                                                        | 25                                                          |

**Supplementary Table S6.** Predicting Fairness Norm Compliance with Multiple Regression in Study 2

|                                          | Model 1                                           |       | Model 2                |             |
|------------------------------------------|---------------------------------------------------|-------|------------------------|-------------|
|                                          | $\beta$ [95% CI]                                  | $p$   | $\beta$ [95% CI]       | $p$         |
| Age                                      | -.04 [-.12, .05]                                  | .38   | -.02 [-.11, .07]       | .61         |
| Gender                                   | .03 [-.06, .11]                                   | .55   | .03 [-.06, .11]        | .50         |
| Education                                | -.08 [-.17, .01]                                  | .073  | -.08 [-.17, .01]       | .09         |
| Income                                   | -.05 [-.14, .04]                                  | .25   | -.05 [-.14, .04]       | .27         |
| Depressed mood                           | -.05 [-.21, .11]                                  | .53   | -.03 [-.19, .12]       | .69         |
| Anxious feeling                          | -.10 [-.26, .06]                                  | .21   | -.10 [-.26, .06]       | .23         |
| Agreeableness                            | -.08 [-.18, .02]                                  | .13   | -.08 [-.18, .02]       | .13         |
| Conscientiousness                        | .13 [.03, .24]                                    | .015  | .13 [.02, .24]         | .018        |
| Extraversion                             | -.01 [-.11, .08]                                  | .79   | -.01 [-.10, .09]       | .92         |
| Openness                                 | -.04 [-.13, .06]                                  | .45   | -.05 [-.14, .05]       | .33         |
| Neuroticism                              | -.04 [-.15, .08]                                  | .51   | -.04 [-.15, .07]       | .51         |
| RAPM                                     | .29 [.20, .38]                                    | <.001 | .26 [.16, .35]         | <.001       |
| WM Capacity                              |                                                   |       | <b>.10 [.003, .20]</b> | <b>.043</b> |
| R <sup>2</sup> (R <sup>2</sup> adjusted) | .17(.15)                                          |       | .18 (.15)              |             |
| Comparison                               | $\Delta R^2 = .01, F_{(1, 439)} = 4.13, p = .043$ |       |                        |             |

Note: RAPM = Raven's Advanced Progressive Matrices.
